# Identification of Genome-Wide Copy Number Variations among Diverse Pig Breeds Using SNP Genotyping Arrays

Jiying Wang<sup>1,2\*</sup>, Haifei Wang<sup>1\*</sup>, Jicai Jiang<sup>1</sup>, Huimin Kang<sup>1</sup>, Xiaotian Feng<sup>1</sup>, Qin Zhang<sup>1</sup>, Jian-Feng Liu<sup>1\*</sup>

**1** Key Laboratory of Animal Genetics, Breeding and Reproduction, Ministry of Agriculture, National Engineering Laboratory for Animal Breeding, College of Animal Science and Technology, China Agricultural University, Beijing, China, **2** Shandong Provincial Key Laboratory of Animal Disease Control and Breeding, Institute of Animal Science and Veterinary Medicine, Shandong Academy of Agricultural Sciences, Jinan, China

## Abstract

Copy number variations (CNVs) are important forms of genetic variation complementary to SNPs, and can be considered as promising markers for some phenotypic and economically important traits or diseases susceptibility in domestic animals. In the present study, we performed a genome-wide CNV identification in 14 individuals selected from diverse populations, including six types of Chinese indigenous breeds, one Asian wild boar population, as well as three modern commercial foreign breeds. We identified 63 CNVRs in total, which covered 9.98 Mb of polymorphic sequence and corresponded to 0.36% of the genome sequence. The length of these CNVRs ranged from 3.20 to 827.21 kb, with an average of 158.37 kb and a median of 97.85 kb. Functional annotation revealed these identified CNVR have important molecular function, and may play an important role in exploring the genetic basis of phenotypic variability and disease susceptibility among pigs. Additionally, to confirm these potential CNVRs, we performed qPCR for 12 randomly selected CNVRs and 8 of them (66.67%) were confirmed successfully. CNVs detected in diverse populations herein are essential complementary to the CNV map in the pig genome, which provide an important resource for studies of genomic variation and the association between various economically important traits and CNVs.

**Citation:** Wang J, Wang H, Jiang J, Kang H, Feng X, et al. (2013) Identification of Genome-Wide Copy Number Variations among Diverse Pig Breeds Using SNP Genotyping Arrays. PLoS ONE 8(7): e68683. doi:10.1371/journal.pone.0068683

**Editor:** Marinus F.W. te Pas, Wageningen UR Livestock Research, Netherlands

**Received:** March 14, 2013; **Accepted:** June 3, 2013; **Published:** July 23, 2013

**Copyright:** © 2013 Wang et al. This is an open-access article distributed under the terms of the Creative Commons Attribution License, which permits unrestricted use, distribution, and reproduction in any medium, provided the original author and source are credited.

**Funding:** The authors appreciate the financial support provided by Program for Changjiang Scholar and Innovation Research Team in University (IRT1191), the National High Technology Research and Development Program of China (863 Program 2011AA100302), the National Natural Science Foundations of China (31272419, 31201779), New-Century Training Program Foundation for the Talents by the State Education Commission of China (NETC-10-0783) and Scientific Research Foundation for the Returned Overseas Chinese Scholars of State Education Ministry. The funders had no role in study design, data collection and analysis, decision to publish, or preparation of the manuscript.

**Competing Interests:** The authors have declared that no competing interests exist.

\* E-mail: liujf@cau.edu.cn

† These authors contributed equally to this work.

## Introduction

Copy number variations (CNVs) are gains and losses of genomic sequence greater than 50 bp between two individuals of a species [1,2]. The milestone work by Iafrate et al. and Sebat et al. 2004 [3,4] firstly revealed CNVs distribute ubiquitously in the human genome. Since then, thousands of novel CNVs were detected in the human genome [5,6,7]. Compared with the most frequent SNP marker, CNVs cover wider genomic regions in terms of total bases involved and have potentially larger effects by changing gene structure and dosage, alternating gene regulation, exposing recessive alleles and other mechanisms [8,9]. As an important form of genetic variation, CNVs are becoming an important source of genetic variance [10] and may account for some of the missing heritability for complex traits [11].

In domestic animals, phenotype variations caused by CNVs were also observed, for instance, the white coat phenotype in pigs caused by the duplication of the *KIT* gene [12,13], the pea-comb phenotype in chickens caused by the copy number alteration in intron 1 of the *SOX5* gene [13] and hair greying and melanoma in horses caused by a 4.6-kb duplication in intron 6 of *STX17* [14]. Additionally, the study by Seroussi et al. [15] showed there were significant associations between the loss of this region and total

merit, and between copy number of this region with the genetic evaluations for protein production, fat production and herd life. These findings demonstrate that CNVs can be considered as promising markers for some phenotypic and economically important traits or diseases in domestic animals.

Different methodologies can be applied to identify or genotype CNVs at a genome-wide scale. So far, there are three main approaches: array comparative genomic hybridization (aCGH), SNP genotyping array and high-throughput sequencing [16,17]. Among these technologies, the SNP genotyping array has the advantage of performing both genome-wide association studies (GWAS) and CNV detection. SNP arrays can simultaneously measure both total signal intensity (Log R ratio – LRR) and allelic intensity ratios (B allele frequency – BAF) in a genomic sample, and allows both DNA copy number and copy-neutral LOH to be assessed [18]. Additionally, SNP arrays use less sample per experiment compared to aCGH, and it is a cost effective technique which allows users to increase the number of samples tested on a limited budget [19].

As one of the most economically important livestock worldwide, pig also represents one of the most important research models for various human diseases [20]. In the past few years, many efforts have been used to detect CNVs in pig genome using different

technological platforms, *i.e.*, aCGH [21,22], PorcineSNP60 BeadChip [23,24,25] and high-throughput sequencing [26]. Previous CNV studies in other species at genome scale suggest that CNVs comprise up to ~12%, 4% and 4.6% of human [5], dog [27] and cattle [28] genome sequence, respectively. Compared with abundance of CNVRs detected in other species, CNVs detected in pig is far from saturation. Besides the platforms employed in CNV detection, findings from previous studies indicate that a considerable proportion of CNVs segregate among distinct breeds [2,24,29]. Hence, a sufficient high-resolution CNV map requires the survey of multiple breeds/populations.

Chinese indigenous breeds have larger genetic diversity and higher average heterozygosity than European breeds [30], which can help to detect fruitful breed-specific CNVs which have segregated among different populations in the course of evolution and selection. In the present study, a genome-wide CNV detection based on the PorcineSNP60 BeadChip was performed in 14 individual selected from diverse populations, including six types of Chinese indigenous breeds, one Asian wild boar population, as well as three modern commercial foreign breeds. Findings in our study have important implications for understanding the genomic variations of pig genome and provide meaningful information for association studies between CNV and economically important phenotypes of pigs in the future.

## Materials and Methods

### Animals

The whole study protocols for collection of the tissue samples of experimental individuals were reviewed and approved by the Institutional Animal Care and Use Committee (IACUC) of China Agricultural University.

According to geographic distribution and phenotypic features, the existing Chinese indigenous pig breeds have been divided into 6 distinct population types, *i.e.*, North China Type, South China Type, Central China Type, Lower Changjiang River Basin Type, Southwest Type and Plateau Type [31]. In this study, a total number of 14 individuals were chosen for SNP genotyping. These animals include one wild sow, four animals from the European breeds of Duroc ( $n = 2$ ), Yorkshire ( $n = 1$ ) and Landrace ( $n = 1$ ) as the representatives of modern commercial breeds and nine unrelated animals selected from six Chinese indigenous breeds as the representatives of Chinese local population, including Tibetan pig (Plateau Type,  $n = 2$ ), Diannan small-ear pig (South China Type,  $n = 2$ ), Meishan pig (Lower Changjiang River Basin Type,  $n = 2$ ), Min pig (North China Type,  $n = 1$ ), Daweizi pig (Central China Type,  $n = 1$ ), and Rongchang pig (Southwest Type,  $n = 1$ ), respectively.

### SNP array genotyping and quality control

Genomic DNA of 14 individuals was extracted from the ear tissue using Qiagen DNeasy Tissue kit (Qiagen, Germany). All DNA samples were analyzed by spectrophotometry and agarose gel electrophoresis. The genotyping platform used was Infinium II Multisample assay (Illumina Inc.). SNP arrays were scanned and analyzed using iScan (Illumina Inc.) and BeadStudio (Version 3.2.2, Illumina, Inc.), respectively. The SNPs physical positions on chromosomes were derived from the swine genome sequence assembly (10.2) ([http://www.ensembl.org/Sus\\_scrofa/Info/Index](http://www.ensembl.org/Sus_scrofa/Info/Index)). The SNPs not mapped or mapped to multi-positions in the Sscrofa10.2 assembly were discarded. A final set of 47961 SNPs on 18 autosomes with a unique position in Sscrofa10.2 was used for further analysis.

To ensure low false positive CNVs identified, the genome-wide intensity signal must have as little noise as possible. According to our previous study [23], the high-confident CNVs can be identified with three criteria for the SNP genotyping, *i.e.*, standard deviation of normalized intensity (Log R ratio, LRR)  $< 0.30$ , B allele frequency (BAF) drift  $< 0.01$  and the GC wave factor of LRR less than 0.05. In the study, all the samples were successfully genotyped with the average sample call rate higher than 99.3%, and all can satisfied the above criteria. The raw data of our SNP chip have been submitted to the Gene Expression Omnibus (<http://www.ncbi.nlm.nih.gov/geo/>) and released under the accession number GSE46733.

### Identification of pig CNVs

Pig CNVs were identified as previously described [23] using PennCNV software [32]. This algorithm incorporates multiple sources of information, including total signal intensity (LRR) and allelic intensity ratio (BAF) at each SNP marker, the distance between neighboring SNPs, the population frequency of B allele (PFB) of SNPs, and the pedigree information where available. Both LRR and BAF were exported from BeadStudio (Illumina Inc.) given the default clustering file for each SNP. The PFB file was calculated based on the BAF of each marker. Furthermore, PennCNV also integrates a computational approach by fitting regression models with GC content to overcome “genomic waves”. The pig gmodel file was generated by calculating the GC content of the 1Mb genomic region surrounding each marker (500kb each side) and the genomic waves were adjusted using the *-gmodel* option. No relationship among the sample was existed, and the pedigree/trio information was not incorporated into the analyses. To reduce the false discover rate in CNV calling, it was also required that CNV contained three or more consecutive SNPs indicating loss or gain signals. Finally, CNVs regions (CNVRs) were determined by aggregating overlapping CNVs identified across all samples according to the criteria proposed by Redon et al. [5].

Due to density limitation of SNPs on chromosome X, *i.e.* about 100 kb of averaged SNP interval, which is more than two folds of the average interval across whole genome, CNVs detected on chromosome X might had high false-positive rate and were excluded from further analyses in our study.

### Gene contents and functional annotation

Gene contents in the CNVRs identified were retrieved from the Ensembl Genes 70 Database using the BioMart (<http://www.biomart.org/>) data management system. Functional annotation was performed with the DAVID bioinformatics resources v6.7 (<http://david.abcc.ncifcrf.gov/summary.jsp>) for Gene Ontology (GO) terms [33] and Kyoto Encyclopedia of Genes and Genomes (KEGG) [34] pathway analyses. Since only a limited number of genes in the pig genome have been annotated, we firstly converted the pig Ensembl gene IDs to orthologous mouse Ensembl gene IDs by BioMart, then carried out the GO and pathway analyses. Statistical significance was assessed by using  $p$  value of a modified Fisher's exact test and Benjamini correction for multiple testing.

We also performed the overlap analyses between CNVRs identified in the study with the reported QTL regions collected in the pig QTL database (Dec 27, 2012, (<http://www.animalgenome.org/cgi-bin/QTLdb/SS/index>) and human disease gene orthologs in Online Mendelian Inheritance in Man annotations (OMIM, <http://omim.org/>).

## Quantitative real time PCR

Quantitative real time PCR (qPCR) was used to validate 12 CNVRs chosen from the total CNVRs detected in the study. The glucagon gene (GCG) is highly conserved between species and has been approved to have a single copy in animals [35]. So, one segment of it was chosen as the intern control region. Primers (Table S7 in File S1) were designed with the Primer3 web tool (<http://frodo.wi.mit.edu/primer3/>). Moreover, the UCSC In-Silico PCR tool (<http://genome.ucsc.edu/cgi-bin/hgPcr?command=start>) was used for in silico specificity analysis. Prior to performing the copy number assay, we generated standard curves for the primers of target and control regions to determine their PCR efficiencies. The PCR efficiencies for all primers used in the study were required to be 1.95–2.10.

All qPCR were carried out using LightCycler® 480 SYBR Green I Master on Roche LightCycler® 480 instrument following the manufacturer's guidelines and cycling conditions. The reactions were carried out in a 96-well plate in 20 µl volume, containing 10 µl Blue-SYBR-Green mix, 1 µl forward and reverse primers (10 pM/µl) and 1 µl 20 ng/µl genomic DNA. Each sample was analyzed in duplicates. The second derivative maximum algorithm included within the instrument software was used to determine cycle threshold (Ct) values for each region. The copy number for each test region was calculated using the  $2^{-\Delta\Delta Ct}$  method [36], which compares the  $\Delta Ct$  (cycle threshold (Ct) of the target region minus Ct of the control region) value of samples with CNV to the  $\Delta Ct$  of a calibrator without CNV.

## Results

### Genome-wide detection of CNVs

In the study, 96 CNVs were identified on 18 autosomes using PennCNV software in 14 individual of diverse populations, including six types of Chinese indigenous breeds, one Asian wild boar population, as well as three modern commercial foreign breeds. The average number of CNVs per individual was 6.92. By aggregating overlapping CNVs, a total of 63 CNVRs (Table S1 in File S1) across genome were identified, which covered 9.98 Mb of polymorphic sequence and corresponded to 0.36% of the genome sequence. The length of these CNVRs ranged from 3.20 to 827.21 kb with a mean of 158.37 kb and a median of 97.85 kb. Among these CNVRs, there were 36 loss, 26 gain and 1 both (loss and gain within the same region) events. Figure 1 summarizes the location and characteristics of all CNVRs on autosomal chromosomes. It can be seen that these CNVRs are not uniformly distributed among different chromosomes. The length proportion of CNVRs on 18 autosomal chromosomes varies from 0–1.30%, with Chr1 harboring the greatest number of CNVRs and chr11 having the densest CNVRs.

Large difference of CNVR numbers were found among the 14 individuals (Table 1). The CNV number identified ranged from 2 (MS8) to 13 (D2), with the average of 6.92. More CNVs per individual were identified in the pigs of modern commercial breeds (10.5) than in pigs of Chinese indigenous breeds and wild population (5.5).

### Gene content and functional analysis

Using the BioMart (<http://www.biomart.org/>) data management system, we retrieved the gene content in the CNVRs identified. Out of the 25322 porcine Ensembl genes, 147 (Table S2 in File S1) were completely or partially overlapped with CNVRs, including 127 protein-coding genes, 11 pseudo genes, 3 miRNA genes, 3 snRNA genes, and 3 genes of other types. These genes are distributed in 38 (60.32%) CNVRs

identified, while the other CNVRs do not contain any annotated genes.

To provide insight into the functional enrichment of the CNVs, Gene Ontology (GO) and Kyoto Encyclopedia of Genes and Genomes (KEGG) pathway analyses were performed with the DAVID bioinformatics resources v6.7 (Table S3 and Table S4 in File S1). The GO analyses revealed 29 GO terms, of which 20 were statistically significant after Benjamini correction. And the significant GO terms were mainly involved in olfactory receptor activity, sensory perception of smell or chemical stimulus, G-protein coupled receptor protein signaling pathway, cell surface receptor linked signal transduction, and other basic metabolic processes. In the KEGG pathway analyses, only one pathway, *i.e.*, olfactory transduction, was identified, which was statistically significant after Benjamini correction.

We compared the CNVRs identified in this study with the reported QTL regions and human disease gene orthologs in OMIM. Out of the 8315 QTL collected in the pig QTL database, 1364 (16.40%) were overlapped with the 61 CNVRs (96.83%) identified in this study (Table S5 in File S1). Since the total length of the CNVRs covers only 0.36% of the whole swine genome, there is a much greater QTL density coinciding with the CNVRs than we see in the genome as a whole. These CNVRs affecting a wide range of traits, such as growth, meat quality, reproduction, immune capacity and disease resistance. In addition, 6 human orthologous genes were also observed in 5 CNVRs (Table S6 in File S1). These genes associated with several human diseases, such as nicotine dependence, schizoaffective disorder, and alpha-1-antichymotrypsin deficiency.

### CNV validation by qPCR

In order to confirm the accuracy of CNV prediction, quantitative real time PCR (qPCR) was used to validate 12 CNVRs chosen from the 63 CNVRs detected in the study. These 12 CNVRs represent different predicted status of copy numbers (*i.e.*, loss, gain and both) and different CNVR frequencies (varied from 7.14 to 28.57%). Two pairs of primers (Table S7 in File S1) were designed for each CNVR and a total of 24 qPCR assays were performed. Out of the 14 samples genotyped, 13 were used in the qPCR assays. The positive predictive rate and negative predictive rates of the 8 CNVRs were calculated.

Out of the 24 qPCR assays, 13 (54.17%) were in agreement with prediction by PennCNV. When counting the CNVRs, 8 (66.6%) out of the 12 CNVRs (Table 2) had positive qPCR confirmations by at least one PCR assay. For the samples predicted as positive of the 8 CNVR, the proportions of confirmed samples (*i.e.* positive predictive rate) varied from 50% to 100%, with an average of 92.31%, whereas for the samples predicted as negative, the proportions of confirmed samples (*i.e.* negative predictive rate) varied from 0 to 100%, with an average of 33.33%.

## Discussion

In the present study, using the PorcineSNP60 Beadchip, we identified 63 CNVRs (96 CNVs) in 14 individual of diverse populations, including six types of Chinese indigenous breeds, one Asian wild boar population, as well as three modern commercial breeds. As shown in Table 1, the CNV number detected per individual varies greatly, ranging from 2 (MS8) to 13 (D2). Chinese indigenous breeds have larger genetic diversity than European breeds [30], and it is expected more CNVs would exist in them. Contrary to expectations, in our study, fewer CNVs per pig were detected in Chinese indigenous and wild pigs (average 5.5) than in

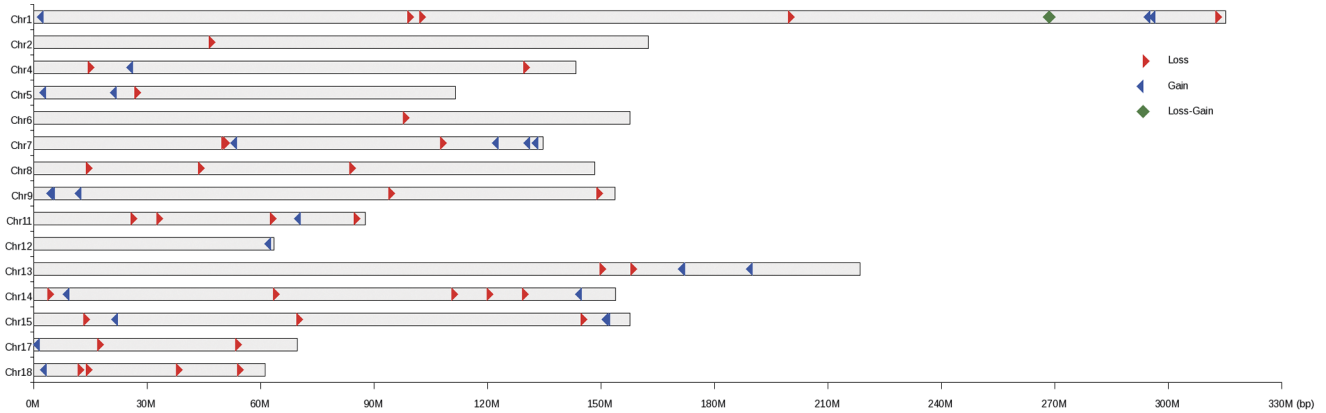

**Figure 1. The distribution and status of detected CNVRs across the pig genome (based on the *Sus scrofa* 10.2 assembly).**  
doi:10.1371/journal.pone.0068683.g001

the modern commercial breeds (average 10.5). Similar result was obtained in the study of Chen et al. [24], in which highest CNVs per pig were found in Duroc. SNP probes in PorcineSNP60 BeadChip were mainly derived from sequence of four modern commercial pig breeds (Duroc, Landrace, Large White, Pietrain) [37], and SNPs among some paralogous genes of Chinese indigenous pigs could not be genotyped. It may be one reason leading to the difference of CNVs detected between Chinese indigenous breeds and modern commercial breeds.

We assessed our results by comparing with CNVRs previously reported [21,22,23,24,25,26]. Of the total 63 CNVRs, 34 (53.98%) were completely or partially overlapped with CNVR detected by other studies (Table 3 and Table S8 in File S1), demonstrating about half of CNVRs identified in the study can be confirmed by other studies. As shown in the Table 3, the CNVR number overlapped with the 6 previous studies varies greatly, and 4 of them have only small number (1~5) CNVRs overlapped with our study. The issue of low overlapping rates between different reports was also encountered in other CNV studies [28,38,39].

The potential reasons for the inconsistency between results of different studies lie in many aspects, such as the differences of samples in size and genetic background, different detection platforms and algorithms for CNV calling, and CNV (CNVR) definition between these studies as well as potential technical and random errors. In the present study, 14 samples of diverse breeds with broader genetic background were used, and it is expected that some new CNVRs would be detected in them. Due to the same detection platform and similar sample populations, the highest percentages of both overlapped CNVs count (49.21%) and sequence length covered (45.13%) were obtained with study performed by Chen et al. [24], which were performed using Porcine SNP60 array based on the 18 pig populations, including several Chinese indigenous breeds.

In order to confirm these potential CNVRs, we performed qPCR for 12 randomly selected CNVRs from the total CNVRs identified in the study and 8 of them (66.67%) were validated successfully. The confirm rate was similar with previous studies [23,25,28], but a little lower than that reported by Ramayo-Caldas

**Table 1. Sample information and CNVs detected in every pig.**

| Types                                    | Breed                 | Sample ID. | Sex    | CNV number | Total Length (kb) |
|------------------------------------------|-----------------------|------------|--------|------------|-------------------|
| <b>Wild boar</b>                         | –                     | A1         | Female | 6          | 1084.98           |
| <b>South China Type</b>                  | Diannan small-ear pig | DN1        | Male   | 8          | 1732.48           |
|                                          |                       | DN5        | Female | 6          | 608.40            |
| <b>North China Type</b>                  | Min pig               | M2         | Female | 5          | 1234.75           |
| <b>Lower Changjiang River Basin Type</b> | Meishan pig           | MS7        | Female | 3          | 1034.12           |
|                                          |                       | MS8        | Female | 2          | 755.68            |
| <b>Southwest Type</b>                    | Rongchang pig         | R2         | Male   | 6          | 874.42            |
| <b>Central China Type</b>                | Daweizi pig           | W1         | Female | 9          | 1475.29           |
| <b>Plateau Type</b>                      | Tibetan pig           | Z2         | Female | 5          | 316.74            |
|                                          |                       | Z5         | Female | 5          | 478.60            |
| <b>Modern commercial breeds</b>          | Landrace              | C3         | Female | 10         | 1285.01           |
|                                          | Duroc                 | D2         | Female | 13         | 1846.16           |
|                                          |                       | D4         | Female | 5          | 1536.03           |
|                                          | Yorkshire             | Y2         | Female | 14         | 1639.64           |
| <b>Mean</b>                              |                       |            |        | 6.93       | 1135.88           |

doi:10.1371/journal.pone.0068683.t001

**Table 2.** Results of quantitative real-time PCR analysis of the 8 confirmed CNVRs.

| CNVR_ID        | Chr. | Strat <sup>a</sup> | Chr.      | End <sup>a</sup> | Freq. | Type | Primer | Predicted positive samples |          |           |                          | Predicted negative samples |          |           |                          | Validated |
|----------------|------|--------------------|-----------|------------------|-------|------|--------|----------------------------|----------|-----------|--------------------------|----------------------------|----------|-----------|--------------------------|-----------|
|                |      |                    |           |                  |       |      |        | Sample                     | detected | confirmed | positive predictive rate | Sample                     | detected | confirmed | negative predictive rate |           |
| 7              | 1    | 296533542          | 296809518 | 0.1429           | gain  | E1-2 | 2      | 2                          | 1        | 1         | 11                       | 9                          | 0.8182   | Y         |                          |           |
|                |      |                    |           |                  |       |      | 2      | 2                          | 1        | 1         | 11                       | 11                         | 1        | Y         |                          |           |
| 50             | 7    | 50327355           | 50750507  | 0.0714           | loss  | D1-1 | 1      | 1                          | 1        | 1         | 12                       | 0                          | 0        | Y         |                          |           |
|                |      |                    |           |                  |       |      | 1      | 1                          | 1        | 1         | 12                       | 0                          | 0        | Y         |                          |           |
| 53             | 7    | 122956303          | 123104663 | 0.1429           | gain  | H1-1 | 2      | 1                          | 0.5      | 11        | 2                        | 0.1818                     | Y        |           |                          |           |
|                |      |                    |           |                  |       |      | 2      | 2                          | 1        | 1         | 11                       | 2                          | 0.1818   | Y         |                          |           |
| 11             | 11   | 62514730           | 62841029  | 0.1429           | loss  | F1-2 | 2      | 2                          | 1        | 11        | 0                        | 0                          | Y        |           |                          |           |
|                |      |                    |           |                  |       |      | 2      | 2                          | 1        | 1         | 11                       | 0                          | 0        | Y         |                          |           |
| 12             | 11   | 70508069           | 71089190  | 0                | gain  | J1-3 | -      | -                          | -        | 11        | 7                        | -                          | N        |           |                          |           |
|                |      |                    |           |                  |       |      | 2      | 2                          | 1        | 1         | 11                       | 4                          | 0.3636   | Y         |                          |           |
| 13             | 11   | 84740020           | 84849706  | 0.0714           | loss  | M1-2 | 1      | 1                          | 1        | 12        | 4                        | 0.3333                     | Y        |           |                          |           |
|                |      |                    |           |                  |       |      | 1      | 1                          | 1        | 1         | 12                       | 4                          | 0.3333   | Y         |                          |           |
| 20             | 14   | 3815879            | 3862162   | 0.1429           | loss  | B1-1 | 2      | 0                          | -        | -         | 11                       | 0                          | N        |           |                          |           |
|                |      |                    |           |                  |       |      | 2      | 1                          | 0.5      | 11        | 5                        | 0.4545                     | Y        |           |                          |           |
| 27             | 15   | 13218467           | 13325812  | 0.2857           | loss  | L1-1 | -      | -                          | -        | 9         | -                        | -                          | N        |           |                          |           |
|                |      |                    |           |                  |       |      | 4      | 4                          | 1        | 1         | 9                        | 6                          | 0.6667   | Y         |                          |           |
| <b>Average</b> |      |                    |           |                  |       |      |        | 0.9231                     |          |           |                          | 0.3333                     |          |           |                          |           |

<sup>a</sup>The Sus scrofa assembly (10.2) ([http://www.ensembl.org/Sus\\_scrofa/Info/Index](http://www.ensembl.org/Sus_scrofa/Info/Index)) was used to indicate the position of the CNVRs. doi:10.1371/journal.pone.0068683.t002

**Table 3.** Comparison between CNVRs detected in the study with those in the previous reports.

| Study                             | CNVR detected in the previous studies |        |      |                |             | Overlaps with this study |            |       |                     |                   |                      |
|-----------------------------------|---------------------------------------|--------|------|----------------|-------------|--------------------------|------------|-------|---------------------|-------------------|----------------------|
|                                   | Methods                               | Sample | CNVR | Range (kb)     | Median (kb) | Mean (kb)                | Total (Mb) | Count | Percentage of count | Total length (kb) | Percentage of length |
| <b>Fadista et al., 2008</b>       | aCGH (385k)                           | 12     | 37   | 1.74–61.92     | 6.89        | 9.32                     | 0.43       | 1     | 1.59                | 0.41              | 0.00                 |
| <b>Ramayo-Caldas et al., 2010</b> | SNP chip (60k)                        | 55     | 49   | 44.65–10715.82 | 170.96      | 754.59                   | 36.97      | 2     | 3.17                | 215.61            | 2.16                 |
| <b>Wang et al., 2012</b>          | SNP chip (60k)                        | 474    | 382  | 5.03–2702.75   | 142.90      | 250.69                   | 95.76      | 5     | 7.94                | 388.09            | 3.89                 |
| <b>Li et al., 2012</b>            | aCGH (720k)                           | 12     | 259  | 2.30–1550      | 98.74       | 65.07                    | 16.85      | 2     | 3.17                | 718.74            | 7.20                 |
| <b>Chen et al., 2012</b>          | SNP chip (60k)                        | 1693   | 565  | 50.39–8102.06  | 252.71      | 247.55                   | 139.87     | 31    | 49.21               | 4502.75           | 45.13                |
| <b>Rubin et al., 2012</b>         | Genome sequencing                     | 117    | 1928 | 0.12–175.50    | 3.00        | 5.23                     | 10.08      | 10    | 15.87               | 561.14            | 5.62                 |
| <b>This study</b>                 | SNP chip (60k)                        | 14     | 63   | 3.20–827.21    | 97.85       | 158.37                   | 9.98       | –     | –                   | –                 | –                    |

Note: The comparison was based on Sus scrofa assembly (10.2). For CNVRs based on the other porcine assembly, we firstly converted the data to current genome coordinates using the UCSC LiftOver tool (<http://genome.ucsc.edu/cgi-bin/hgLiftOver>). doi:10.1371/journal.pone.0068683.t003

et al. [25] and Chen et al [24]. For the 8 CNVRs confirmed in the qPCR analysis, the average proportion of the positive predictive rate was 92.31%, demonstrating that, for the predicted positive samples, qPCR assays agree well with the PennCNV prediction. As for the discrepancy between qPCR assay and prediction, the most important reason is primers out of the actual boundaries of CNVs for some individuals. Due to the low marker density, non-uniform distribution of SNPs along pig chromosomes [37], CNVs called based on PorcineSNP60 BeadChip are usually large and with inaccurate boundaries. Beside the primers location used to validate the CNVRs, potential SNPs and small indels could also influence the hybridization of the qPCR primers in some animals, and result in unstable quantification values or reducing primer efficiency. Contrary to predicted positive samples, high negative predictive rate (average 33.33%) indicated that some predicted negative samples did not agree with the PennCNV prediction. In particular, for the CNVR#7, the negative predictive rate is as high as 81.82% and 100%. False negative is common in CNV detection, and has also been reported previously in pig and other mammalian species [23,25,27]. It can be explained by the stringent criteria of CNV calling which minimizes the false-positive, on the other hand leads to high false-negative rate.

Three out of the 8 successfully validated CNVRs contain functionally important genes. Two qPCR assays with primers located in two olfactory receptor 1J4-like genes (*LOC100623462* and *LOC100157267*) were used for *CNVR22* validation. The olfactory receptor gene superfamily is the largest in vertebrate genomes, which function in the reception of innumerable odour molecules in the environment. Previous studies have showed that CNVs are highly prevalent among human and other vertebrate *OR* genes [40,41,42]. Two qPCR assays with primers located in two defensins genes (*BD114* and *DEFB110*) were used for *CNVR#50* validation. Defensins are one of the largest and most studied families of antimicrobial peptides. In addition to their antimicrobial activity, they are also thought to play fundamental roles in both innate and adaptive immunity in higher organisms. A qPCR assay with primers located in the *SERPINA3* gene was used for validation of *CNVR#53*. *SERPINA3* also known as alantichymotrypsin, is a typical acute-phase protein secreted into the circulation during acute and chronic inflammation. Variations in this protein's sequence have been implicated in Alzheimer's disease, and deficiency of this protein has been associated with liver disease [43,44]. By impacting the gene product amount or the regulation of these genes, copy number change of these immune-related genes, such as defensins and *SERPINA3*, may have a great influence on pathogen monitoring and disease resistance of diverse pigs.

Most of the CNVRs identified in the study span QTL regions, which influence a wide range of traits, especially growth, meat quality, reproduction, immune capacity and disease resistance, indicating these CNVRs may play an important role in pig economically important traits and disease susceptibility. These CNVRs cover or overlap with a total of 147 genes. Functional analyses, such as GO and pathway, showed that these genes were mainly enriched in sensory perception of the environment, response to external stimuli and immunity, which is consistent with other previous studies [23,27,28,45]. Additionally, several CNVRs spanned genes associated with several important human diseases. These demonstrated that the CNVRs identified in the study may play an important role in exploring the genetic basis of phenotypic variability and disease susceptibility among pigs.

In summary, we have performed a genome-wide CNV detection based on the PorcineSNP60 genotyping data of 14 pigs of diverse breeds. A total of 63 CNVRs were identified, which is an

important complementary to the CNV map in the pig genome. Validation of 12 CNVRs of these CNVRs produced a similar confirm rate (66.67%) as previous CNV studies based on SNP arrays. Functional annotation revealed the CNVR identified have important molecular function, and may play an important role in phenotypic variation and are often related with disease susceptibility. However, only large CNVRs (Average length 158.37 kb) were identified using this SNP panel. As statistics of the size distribution of human CNVs in Database of Genomic Variants (<http://dgvbeta.tcag.ca/dgv/app/home?ref=NCBI36/hg18>), the CNVRs are most abundant in the 1 to 10 kb range, and the CNVR number decrease gradually when the the CNVR length larger or smaller than the range. Thus, the number of CNVs identified in this study is likely to be a greatly underestimation of the true number of CNVs in these pig genomes. Follow-up studies, using improved SNP arrays as well as other technologies, such as aCGH and next-generation sequencing, should be carried out to attain high-resolution CNV map.

## References

- Liu GE, Bickhart DM (2012) Copy number variation in the cattle genome. *Funct Integr Genomics*: 609–624.
- Mills RE, Walter K, Stewart C, Handsaker RE, Chen K, et al. (2011) Mapping copy number variation by population-scale genome sequencing. *Nature* 470: 59–65.
- Iafraite AJ, Feuk L, Rivera MN, Listewnik ML, Donahoe PK, et al. (2004) Detection of large-scale variation in the human genome. *Nat Genet* 36: 949–951.
- Sebat J, Lakshmi B, Troge J, Alexander J, Young J, et al. (2004) Large-scale copy number polymorphism in the human genome. *Science* 305: 525–528.
- Redon R, Ishikawa S, Fitch KR, Feuk L, Perry GH, et al. (2006) Global variation in copy number in the human genome. *Nature* 444: 444–454.
- Sudmant PH, Kitzman JO, Antonacci F, Alkan C, Malig M, et al. (2010) Diversity of human copy number variation and multicopy genes. *Science* 330: 641–646.
- Park H, Kim JI, Ju YS, Gokcumen O, Mills RE, et al. (2010) Discovery of common Asian copy number variants using integrated high-resolution array CGH and massively parallel DNA sequencing. *Nat Genet* 42: 400–405.
- Henrichsen CN, Chaignat E, Reymond A (2009) Copy number variants, diseases and gene expression. *Hum mol genet* 18: R1–8.
- Zhang F, Gu W, Hurler ME, Lupski JR (2009) Copy number variation in human health, disease, and evolution. *Annu Rev Genomics Hum Genet* 10: 451–481.
- Feuk L, Carson AR, Scherer SW (2006) Structural variation in the human genome. *Nat Rev Genet* 7: 85–97.
- Gamazon ER, Nicolae DL, Cox NJ (2011) A study of CNVs as trait-associated polymorphisms and as expression quantitative trait loci. *PLoS Genet* 7: e1001292.
- Marklund S, Kijas J, Rodriguez-Martinez H, Rönnstrand L, Funa K, et al. (1998) Molecular basis for the dominant white phenotype in the domestic pig. *Genome res* 8: 826–833.
- Giuffra E, Törnsten A, Marklund S, Bongcam-Rudloff E, Chardon P, et al. (2002) A large duplication associated with dominant white color in pigs originated by homologous recombination between LINE elements flanking KIT. *Mamm Genome* 13: 569–577.
- Pielberg GR, Golovko A, Sundström E, Curik I, Lennartsson J, et al. (2008) A cis-acting regulatory mutation causes premature hair graying and susceptibility to melanoma in the horse. *Nat genet* 40: 1004–1009.
- Seroussi E, Glick G, Shirak A, Yakobson E, Weller JI, et al. (2010) Analysis of copy loss and gain variations in Holstein cattle autosomes using BeadChip SNPs. *BMC genomics* 11: 673.
- Clop A, Vidal O, Amills M (2012) Copy number variation in the genomes of domestic animals. *Anim Genet* 43: 503–517.
- Alkan C, Coe BP, Eichler EE (2011) Genome structural variation discovery and genotyping. *Nat Rev Genet* 12: 363–376.
- Peiffer DA, Le JM, Steemers FJ, Chang W, Jenniges T, et al. (2006) High-resolution genomic profiling of chromosomal aberrations using Infinium whole-genome genotyping. *Genome res* 16: 1136–1148.
- Winchester L, Yau C, Ragoussis J (2009) Comparing CNV detection methods for SNP arrays. *Brief Funct Genomic Proteomic* 8: 353–356.
- Meurens F, Summerfield A, Nauwynck H, Saif L, Gerdt V (2012) The pig: a model for human infectious diseases. *Trends in Microbiol* 20: 50–57.
- Li Y, Mei S, Zhang X, Peng X, Liu G, et al. (2012) Identification of genome-wide copy number variations among diverse pig breeds by array CGH. *BMC genomics* 13: 725.
- Fadista J, Nygaard M, Holm LE, Thomsen B, Bendixen C (2008) A snapshot of CNVs in the pig genome. *PLoS One* 3: e3916.
- Wang J, Jiang J, Fu W, Jiang L, Ding X, et al. (2012) A genome-wide detection of copy number variations using SNP genotyping arrays in swine. *BMC genomics* 13: 273.
- Chen C, Qiao R, Wei R, Guo Y, Ai H, et al. (2012) A comprehensive survey of copy number variation in 18 diverse pig populations and identification of candidate copy number variable genes associated with complex traits. *BMC genomics* 13: 733.
- Ramayo-Caldas Y, Castelló A, Pena RN, Alves E, Mercadé A, et al. (2010) Copy number variation in the porcine genome inferred from a 60 k SNP BeadChip. *BMC genomics* 11: 593.
- Rubin CJ, Megens HJ, Barrio AM, Maqbool K, Sayyab S, et al. (2012) Strong signatures of selection in the domestic pig genome. *Proc Natl Acad Sci U S A*. 109:19529–19536.
- Nicholas TJ, Cheng Z, Ventura M, Mealey K, Eichler EE, et al. (2009) The genomic architecture of segmental duplications and associated copy number variants in dogs. *Genome res* 19: 491–499.
- Hou Y, Liu GE, Bickhart DM, Cardone MF, Wang K, et al. (2011) Genomic characteristics of cattle copy number variations. *BMC genomics* 12: 127.
- Liu GE, Hou Y, Zhu B, Cardone MF, Jiang L, et al. (2010) Analysis of copy number variations among diverse cattle breeds. *Genome res* 20: 693–703.
- Zhang C, Plastow G (2011) Genomic Diversity in Pig (*Sus scrofa*) and its Comparison with Human and other Livestock. *Curr Genomics* 12: 138–146.
- Zhang ZG, Li B, Chen X (1986) Pig breeds in China. Shanghai: Shanghai Scientific and Technical Publisher. 17–24.
- Wang K, Li M, Hadley D, Liu R, Glessner J, et al. (2007) PennCNV: an integrated hidden Markov model designed for high-resolution copy number variation detection in whole-genome SNP genotyping data. *Genome res* 17: 1665–1674.
- Ashburner M, Ball CA, Blake JA, Botstein D, Butler H, et al. (2000) Gene Ontology: tool for the unification of biology. *Nat genet* 25: 25–29.
- Hall MA, Norman PJ, Thiel B, Tiwari H, Peiffer A, et al. (2002) Quantitative-trait loci on chromosomes 1, 2, 3, 4, 8, 9, 11, 12, and 18 control variation in levels of T and B lymphocyte subpopulations. *Am J Hum Genet* 70: 1172–1182.
- Ballester M, Castelló A, Ibáñez E, Sánchez A, Folch JM (2004) Real-time quantitative PCR-based system for determining transgene copy number in transgenic animals. *Biotechniques* 37: 610–613.
- Livak KJ, Schmittgen TD (2001) Analysis of relative gene expression data using real-time quantitative PCR and the 2<sup>-[Delta]([Delta])</sup> CT method. *Methods* 25: 402–408.
- Ramos AM, Crooijmans R, Affara NA, Amaral AJ, Archibald AL, et al. (2009) Design of a high density SNP genotyping assay in the pig using SNPs identified and characterized by next generation sequencing technology. *PLoS One* 4: e6524.
- Matsuzaki H, Wang PH, Hu J, Rava R, Fu GK (2009) High resolution discovery and confirmation of copy number variants in 90 Yoruba Nigerians. *Genome Biol* 10: R125.
- Jiang L, Jiang J, Wang J, Ding X, Liu J, et al. (2012) Genome-Wide Identification of Copy Number Variations in Chinese Holstein. *PLoS One* 7: e48732.
- Hasin Y, Olender T, Khen M, Gonzaga-Jauregui C, Kim PM, et al. (2008) High-resolution copy-number variation map reflects human olfactory receptor diversity and evolution. *PLoS Genet* 4: e1000249.

## Supporting Information

**File S1 File includes Tables S1–S8.** Table S1: The detailed information of each CNVR identified in this study. Table S2: Annotation of genes in CNVRs detected in this study. Table S3: Gene Ontology of genes in CNVRs identified. Table S4: Pathway of genes in CNVRs identified. Table S5: QTLs harbored within or partially overlapped with identified CNVRs across the pig genome. Table S6: The CNVRs completely or partially overlapped genes in Online Mendelian Inheritance in Man annotations. Table S7: Information of the validated CNVRs and the primers used in quantitative PCR analyses. Table S8: Detail information between CNVRs detected in the study with those in the previous reports. (XLS)

## Author Contributions

Conceived and designed the experiments: JFL. Performed the experiments: JW HW. Analyzed the data: JJ HK XTF. Wrote the paper: JW JFL QZ.

41. Nozawa M, Nei M (2008) Genomic drift and copy number variation of chemosensory receptor genes in humans and mice. *Cytogenet Genome Res* 123: 263–269.
42. Nguyen D, Lee K, Choi H, Choi M, Le M, et al. (2012) The complete swine olfactory subgenome: expansion of the olfactory gene repertoire in the pig genome. *BMC genomics* 13: 584.
43. Guan F, Gu J, Hu F, Zhu Y, Wang W (2012) Association between  $\alpha$ 1-antichymotrypsin signal peptide -15A/T polymorphism and the risk of Alzheimer's disease: a meta-analysis. *Mol biol rep* 39: 6661–6669.
44. Ortega L, Balboa F, González L (2010) alpha(1)-Antichymotrypsin deficiency associated with liver cirrhosis. *Pediatr Int* 52: 147–149.
45. De Smith AJ, Walters RG, Froguel P, Blakemore AJ (2008) Human genes involved in copy number variation: Mechanisms of origin, functional effects and implications for disease. *Cytogenet Genome Res* 123: 17–26.
